# Supplementary material for: The role of case proximity in transmission of visceral leishmaniasis in a highly endemic village in Bangladesh
Source: PLoS Negl Trop Dis. 2018 Oct 8;12(10):e0006453. doi: 10.1371/journal.pntd.0006453 (PMC6175508; doi:10.1371/journal.pntd.0006453)
Supplement: S1 Table — Odds ratios for VL and asymptomatic infection risk based on proximity to infected individuals (from previous studies). (XLSX) [file pntd.0006453.s001.xlsx]

## Sheet: StudyDetails
Study	Title	Country	State	District(s)	Sub-district(s)	Villages/Wards	Study period	Sample size	DOI
Barnett et al, 2005	Virgin Soil: The Spread of Visceral Leishmaniasis into Uttar Pradesh, India	India	Uttar Pradesh	Varanasi, Allahabad			1999-2004	2203	https://doi.org/10.4269/ajtmh.2005.73.720
Bern et al, 2005	Risk Factors for Kala-Azar in Bangladesh	Bangladesh	Mymensingh	Mymensingh	Fulbaria	3 paras (hamlets) with highest reported pre-2002 incidence out of 9 paras in 1 highly endemic village	1999-2003	2298	https://doi.org/10.3201/eid1105.040718
Bern et al, 2007	The Epidemiology of Visceral Leishmaniasis and Asymptomatic Leishmanial Infection in a Highly Endemic Bangladeshi village	Bangladesh	Mymensingh	Mymensingh	Fulbaria	3 paras (hamlets) with highest reported pre-2002 incidence out of 9 paras in 1 highly endemic village	2001-2002	1546	https://doi.org/10.4269/ajtmh.2007.76.909
Bhattarai et al, 2009	PCR and direct agglutination as Leishmania infection markers among healthy Nepalese subjects living in areas endemic for Kala-Azar	Nepal	Provinces No. 1 and No. 2	Sunsari, Morang, Sapatri (Nepal)		10 study clusters of ~500 individuals within 10 wards with highest incidence in previous 3 years (Morang: Pathari, Sanischare; Sunsari: Dharan-17, Dharan-14, Bhokraha, Aurabani, Duhabi, Tanmuna, Amahibelha; Sapatri: Joganiya)	Nov-Dec 2006	206	https://doi.org/10.1111/j.1365-3156.2009.02242.x
Bimal et al, 2005	Usefulness of the direct agglutination test in the early detection of subclinical Leishmania donovani infection: a community-based study	India	Bihar	Muzaffarpur		Karja public-health centre		234	https://doi.org/10.1179/136485905X65107
Gidwani et al, 2009	Longitudinal Seroepidemiologic Study of Visceral Leishmaniasis in Hyperendemic Regions of Bihar, India	India	Bihar	Muzaffarpur	Sahebganj			870	https://doi.org/10.4269/ajtmh.2009.80.345
Khanal et al, 2010	Spatial analysis of Leishmania donovani exposure in humans and domestic animals in a recent kala azar focus in Nepal	Nepal	Province No. 1	Sunsari	Dharan	Dharan-17	2007-11-01	328	https://doi.org/10.1017/S0031182010000521
Picado et al, 2014	Risk Factors for Visceral Leishmaniasis and Asymptomatic Leishmania donovani Infection in India and Nepal	India, Nepal	Bihar; Provinces No. 1 and No. 2	Muzaffarpur (India); Saptari, Sunsari, Morang (Nepal)		14 clusters in India, 6 clusters in Nepal	Nov 2006 - May 2009	7538	https://doi.org/10.1371/journal.pone.0087641
Rijal et al, 2010	Epidemiology of Leishmania donovani infection in high-transmission foci in Nepal	Nepal	Provinces No. 1 and No. 2	Morang, Sapatri, Sunsari		10 study clusters of ~500 individuals within 10 wards with highest incidence in previous 3 years (Morang: Pathari, Sanischare; Sunsari: Dharan-17, Dharan-14, Bhokraha, Aurabani, Duhabi, Tanmuna, Amahibelha; Sapatri: Joganiya)	Jul-Oct, Nov-Dec 2006	5397	https://doi.org/10.1111/j.1365-3156.2010.02518.x
Topno et al, 2010	Asymptomatic infection with visceral leishmaniasis in a disease-endemic area in Bihar, India	India	Bihar	Patna		Bhakhra (Masauri Primary Health Center)	>2005	355	https://doi.org/10.4269/ajtmh.2010.09-0345

## Sheet: ORsForVLandInfection
Study	Factor	Group	OR for VL	95% CI	p-value	OR for VL vs remaining DAT-	95% CI	p-value	Unadjusted OR for VL vs DAT seroconversion	95% CI	p-value	OR for VL vs rK39 ELISA seropositivity	95% CI	p-value	OR for VL progression from DAT seropositivity	95% CI	p-value	OR for VL progression from rK39 RDT/DAT/PCR positivity	95% CI	p-value	OR for DAT seroconversion	95% CI	p-value	OR for rK39 positivity	95% CI	p-value	OR for LST positivity	95% CI	p-value	OR for DAT seropositivity	95% CI	p-value	OR for PCR seropositivity	95% CI	p-value
Barnett et al, 2005	Distance from closest VL case	>10m	Ref	-	-
		≤10m	1.77 (village 1) 4.11 (village 2)	0.88-3.60 (village 1) 0.97-17.5 (village 2)	0.11 (village 1) 0.056 (village 2)
		Same HH	19.8 (village 1) 72.1 (village 2)	9.55-40.9 (village 1) 29.3-177 (village 2)	<0.0005
Bern et al, 2005	Distance from closest previous VL case	>50m	Ref	-	-
		<50m	2.9	15.0-43.7	<0.0001
		Same HH	25.6	1.6-5.4	0.0006
Bern et al, 2007	Distance from closest previous VL case	>50m	Ref	-	-																			Ref	-	-	Ref	-	-
		<50m	1.85	0.95–3.60	0.07																			1.37	1.09-3.16	0.03	1.72	1.24-2.39	0.002
		Same HH	6.37	3.30–12.28	<0.0001																			1.85	0.88-2.11	0.16	2.86	1.98-4.14	<0.0001
	Distance from closest previous VL case	Outside HH										Ref	-	-
		Same HH										2.85	1.45-5.61	0.003
Bhattarai et al, 2009	History of VL in HH	No known VL cases in HH																												Ref	-	-	Ref	-	-
		HH contact of current/past VL case																												4.52632	1.40-14.6	0.0117	0.669643	0.19-2.38	0.536
Bimal et al, 2005	History of VL in HH	No h/o VL in HH													Ref	-	-													Ref	-	-
		HH with active/cured VL case													6.04545	0.68-53.7	0.106													4.02449	2.09-7.76	<0.0001
Gidwani et al, 2009	History of VL in HH	No h/o VL in HH	Ref	-	-																			Ref	-	-				Ref	-	-
		Current/previous VL in HH	12.8727	1.73-95.6	0.0125																			1.0827	0.72-1.63	0.705				1.35552	0.98-1.88	0.068
Khanal et al, 2010	History of VL in HH	No h/o VL in HH																												Ref	-	-
		Past VL cases in HH																												IRR: 2.62	1.46-4.70
Picado et al, 2014	Presence of other VL cases in HH Nov 2006-May 2009	No other VL cases in HH				Ref	-	-	Ref	-	-										Ref	-	-
		Other VL cases in HH				3.03	1.68-5.48	<0.001	2.4	1.35-4.25	0.0027										1.66	1.16-2.36	0.005
	Presence of other DAT+ves in HH at baseline (Nov 2006)	No other DAT+ves in HH				Ref	-	-	Ref	-	-										Ref	-	-
		Other DAT+ves in HH				2.43	1.55-3.79	<0.001	1.70444	1.09-2.67	0.02										1.37	1.12-1.67	0.002
	Presence of other DAT seroconvertors in HH (Nov 2006 - Nov 2008)	No other DAT seroconvertors in HH				Ref	-	-	Ref	-	-										Ref	-	-
		Other DAT seroconvertors in HH				2.22	1.38-3.58	0.001	1.09965	0.70-1.73	0.681										2.22	1.79-2.75	<0.001
	Presence of other DAT seroconvertors <50m from HH (Nov 2006 - Nov 2008)	No DAT seroconvertors around HH				Ref	-	-	Ref	-	-										Ref	-	-
		DAT seroconvertors around HH				8.73	2.59-29.41	<0.001	3.03333	1.08-8.56	0.036										1.2	0.86-1.68	0.273
Rijal et al, 2010	History of VL in HH since Nov 2004	No past VL cases in HH																												Ref	-	-
		Past VL cases in HH																												8.35165	-	<0.001
Topno et al, 2010	Proximity to VL cases	Case contacts (HH with VL case in past 2 yrs?)																Ref	-	-
		Neighbours																IRR: 3.36	0.75-15.01	0.09
